# Supplementary material for: Regulatory Mechanisms of Metamorphic Neuronal Remodeling Revealed Through a Genome-Wide Modifier Screen in Drosophila melanogaster
Source: PubMed Central journal article supplement (PMC5500141; doi:10.1534/genetics.117.200378), 2017-05-05
Supplement: 1429FigureS2.pdf [file 1429FigureS2.pdf]

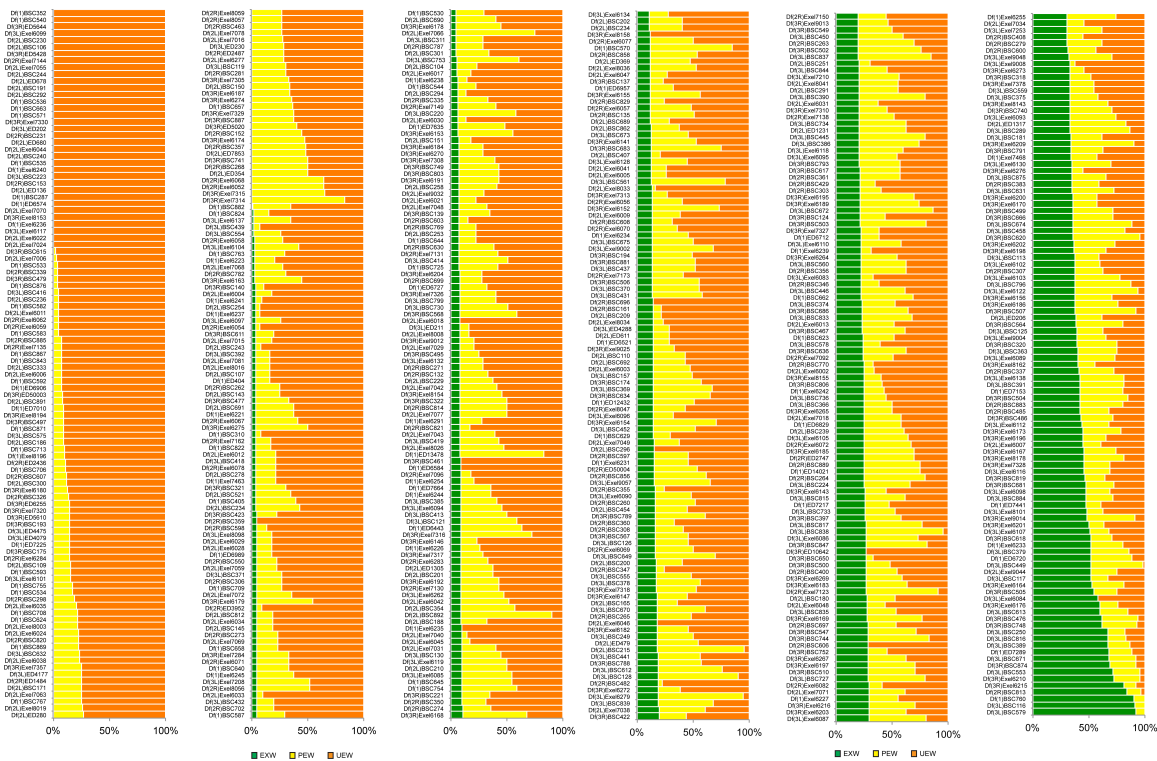

**Figure S2. Wing expansion percentages for test crosses with deficiencies.** Wing expansion rates were quantified and plotted for progeny of test crosses between *386>shep-RNAi*, *Dcr-2*, *tub-Gal80ts* flies and the 633 deficiencies that generated adult progeny. The deficiencies were sorted for this figure based on the EXW and then the PEW scores.
