# Supplementary material for: Regulatory Mechanisms of Metamorphic Neuronal Remodeling Revealed Through a Genome-Wide Modifier Screen in Drosophila melanogaster
Source: PubMed Central journal article supplement (PMC5500141; doi:10.1534/genetics.117.200378), 2017-05-05
Supplement: 1429FigureS4.pdf [file 1429FigureS4.pdf]

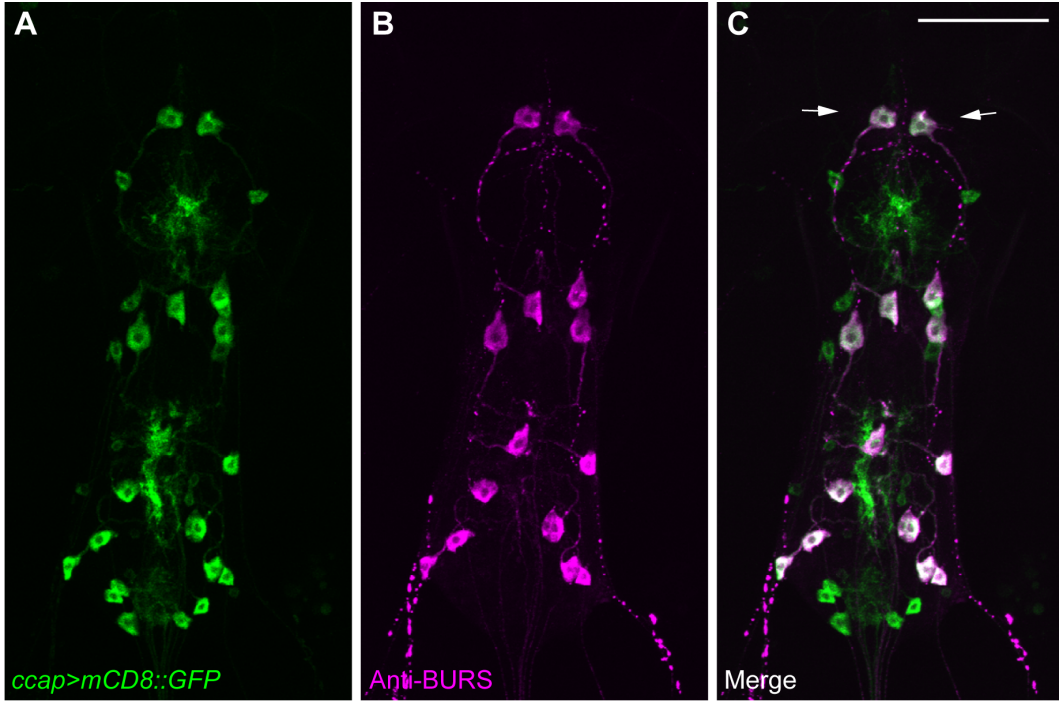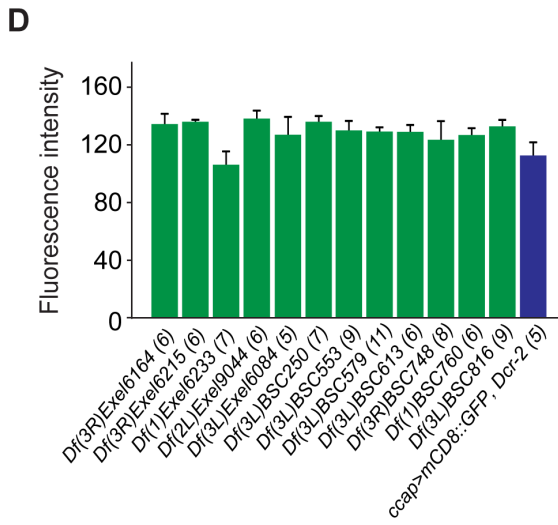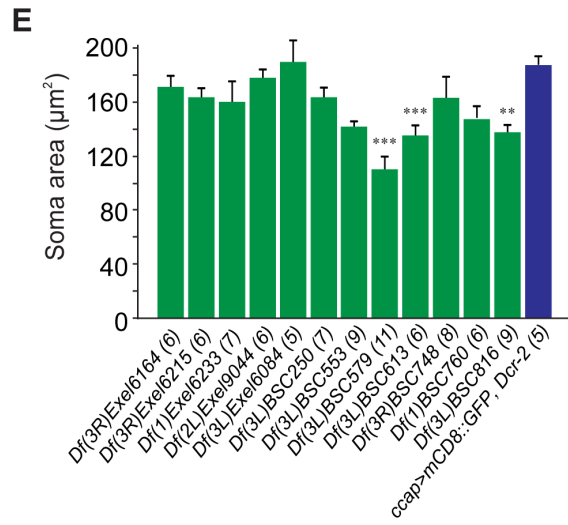

**Figure S4. Suppressor deficiencies did not directly promote growth or affect expression of an mCD8::GFP reporter.** (A-C) The B<sub>AG</sub> neurons expressed bursicon peptides (panel B, anti-BURS immunostaining) that were co-localized with mCD8::GFP driven under control of the *ccap-Gal4* driver (panel A). Panel C shows the merged image. Scale bar: 100  $\mu$ m. (D) Expression levels of mCD8::GFP in the most anterior pair of B<sub>AG</sub> neurons (arrows) of *ccap>mCD8::GFP/deficiency* animals, measured as soma fluorescence.  $P>0.931$ , One-way ANOVA. (E) B<sub>AG</sub> neuron soma areas resulting from the same crosses as in panel D. The most anterior pair of B<sub>AG</sub> neurons (arrowheads in panel C) was examined. None of the suppressor deficiencies promoted cell growth, although three of them significantly reduced soma size.  $P<0.000001$ , One-way ANOVA (\*\*\*,  $P<0.001$ , \*\*,  $P<0.01$ , Tukey HSD *post hoc*).
