# Supplementary material for: Regulatory Mechanisms of Metamorphic Neuronal Remodeling Revealed Through a Genome-Wide Modifier Screen in Drosophila melanogaster
Source: PubMed Central journal article supplement (PMC5500141; doi:10.1534/genetics.117.200378), 2017-05-05
Supplement: 1429FigureS5.pdf [file 1429FigureS5.pdf]

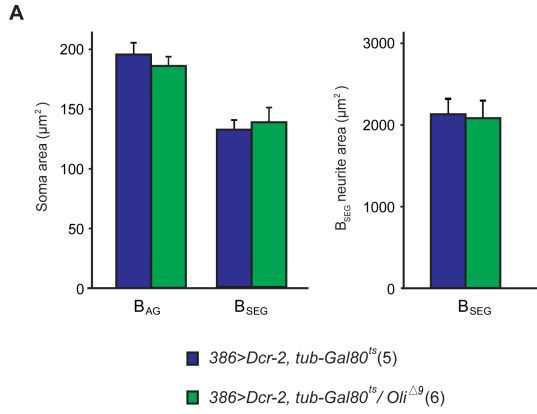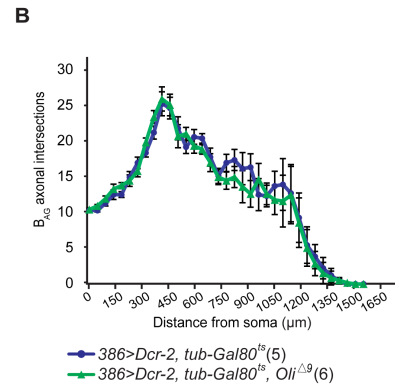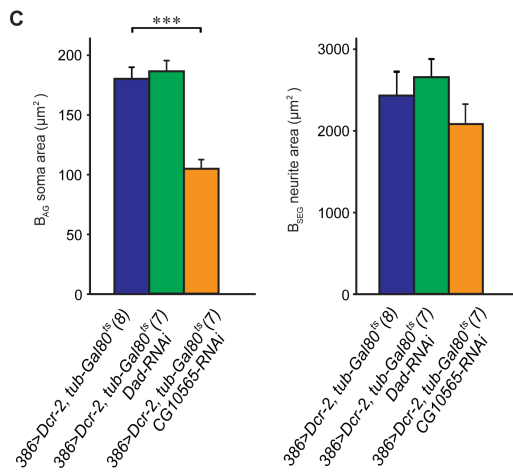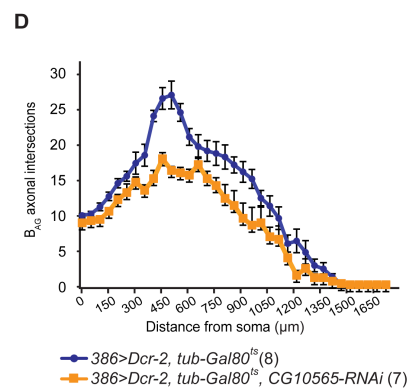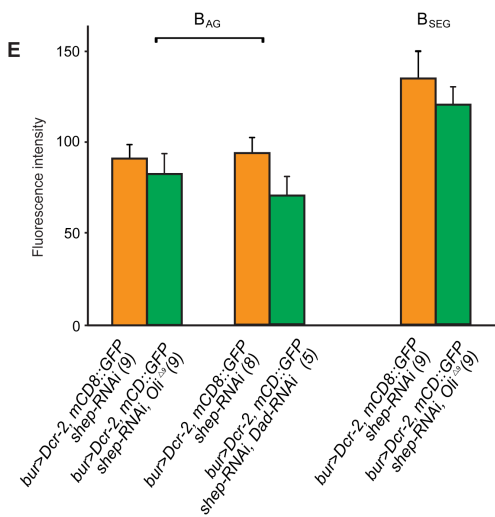

**Figure S5. RNAi or mutant allele transgenes did not affect morphology of bursicon neurons on their own.** (A-B) The *Oli<sup>Δ9</sup>* mutant allele did not affect soma size or neurite morphology (B, Sholl analysis) of the bursicon neurons in the absence of *shep* RNAi.  $P > 0.05$ , Student's *t*-test. (C) *Dad* RNAi did not affect morphology of bursicon neurons in the absence of *shep* RNAi. *CG10565* RNAi alone was sufficient to result in smaller B<sub>AG</sub> soma sizes.  $P < 0.00001$ , One-way ANOVA, (\*\*\*,  $P < 0.001$ , Tukey HSD *post hoc*). (D) *CG10565* RNAi alone was sufficient to result in fewer axonal projections of B<sub>AG</sub> cells. (E) Both *Oli<sup>Δ9</sup>* and *Dad* RNAi showed similar GFP expression levels in the B<sub>AG</sub> and B<sub>SEG</sub> cells, suggesting that they suppressed loss-of-*shep* phenotypes without affecting general transcription levels.  $P > 0.05$ , Student's *t*-test.
