# Supplementary material for: Regulatory Mechanisms of Metamorphic Neuronal Remodeling Revealed Through a Genome-Wide Modifier Screen in Drosophila melanogaster
Source: PubMed Central journal article supplement (PMC5500141; doi:10.1534/genetics.117.200378), 2017-05-05
Supplement: 1429FigureS6.pdf [file 1429FigureS6.pdf]

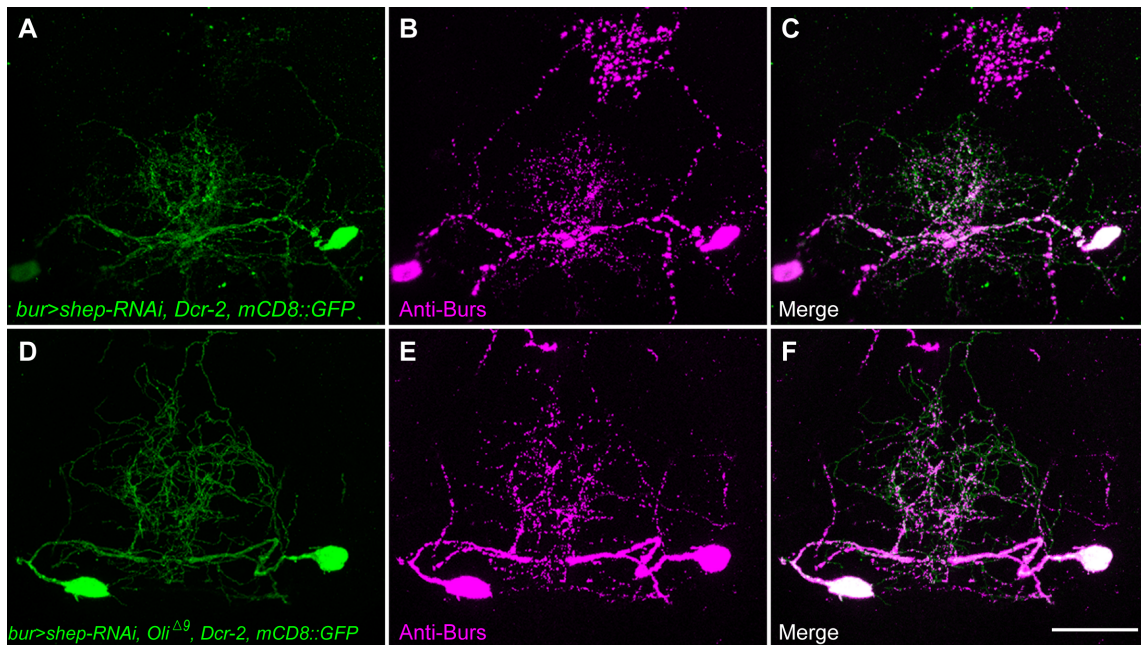

**Figure S6. The neurite arbor of the B<sub>SEG</sub> neurons was resolved with anti-BURS immunostaining and mCD8::GFP.** (A-C) Anti-BURS immunostaining (panel A) and the mCD8::GFP membrane tag (panel B) provided similar resolution of the B<sub>SEG</sub> neurites (panel C). (D-F) The equivalent labeling by anti-BURS (panel D) and mCD8::GFP (panel E) was maintained in loss-of-*shep* animals with a heterozygous *Oli<sup>Δ9</sup>* allele (panel F, merge).
